# Supplementary material
Source: publisher figshare collection journal article supplement (https://acs.figshare.com/ndownloader/files/21844029)
Supplement: Supplementary file 1 [file 21844029]

## Supporting Information

### Electrochemical Dehydrogenation of Ethane to Ethylene in a Solid Oxide Electrolyser

Xirui Zhang<sup>1</sup>, Lingting Ye<sup>1</sup>, Hao Li<sup>1</sup>, Fanglin Chen<sup>2</sup>, Kui Xie<sup>1,\*</sup>

<sup>1</sup> Key Laboratory of Design and Assembly of Functional Nanostructures, Fujian Institute of Research on the Structure of Matter, Chinese Academy of Sciences, Fuzhou, Fujian 350002, China.

<sup>2</sup> Department of Mechanical Engineering, University of South Carolina, 300 Main Street, Columbia, SC 29208, USA.

\* Corresponding Author's E-mail: [kxie@fjirsm.ac.cn](mailto:kxie@fjirsm.ac.cn)

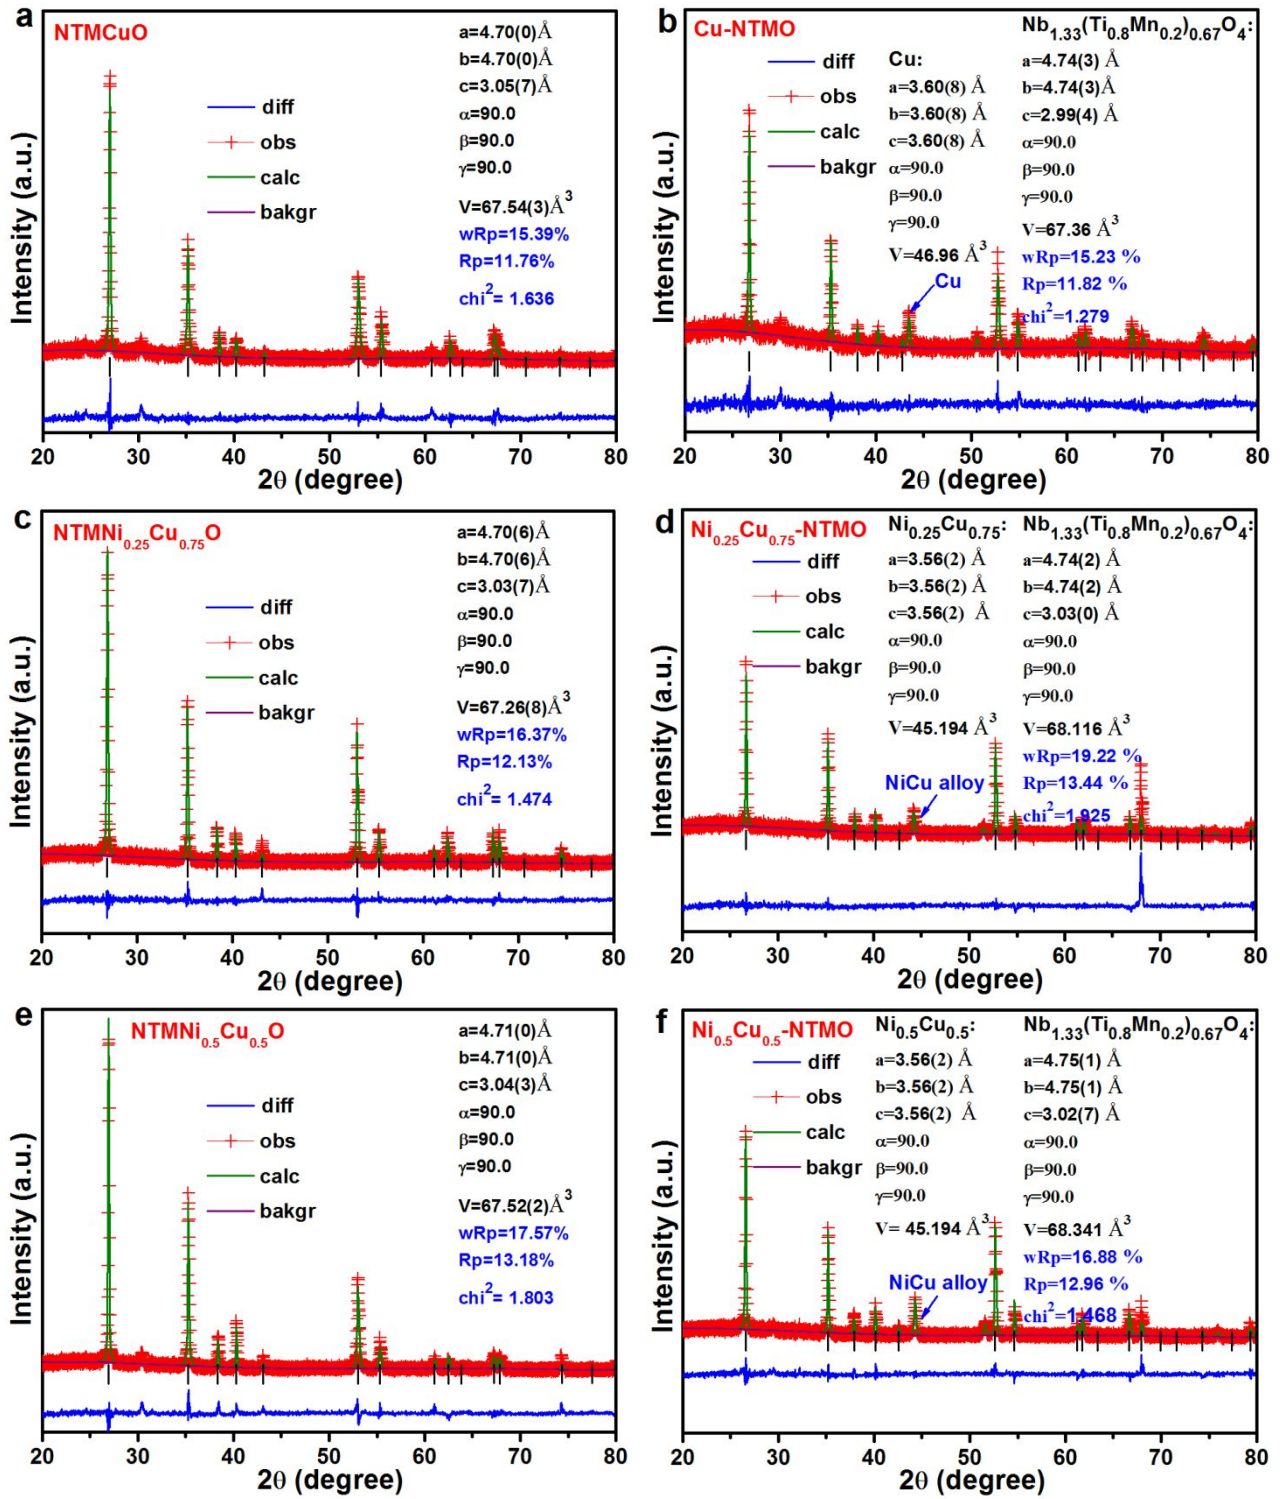

**Figure S1.** XRD rietveld refinement patterns of (a) oxidized NTMCuO; (b) reduced Cu-NTMO; (c) oxidized NTMNi<sub>0.25</sub>Cu<sub>0.75</sub>O; (d) reduced Ni<sub>0.25</sub>Cu<sub>0.75</sub>-NTMO; (e) oxidized NTMNi<sub>0.5</sub>Cu<sub>0.5</sub>O; (f) reduced Ni<sub>0.5</sub>Cu<sub>0.5</sub>-NTMO.

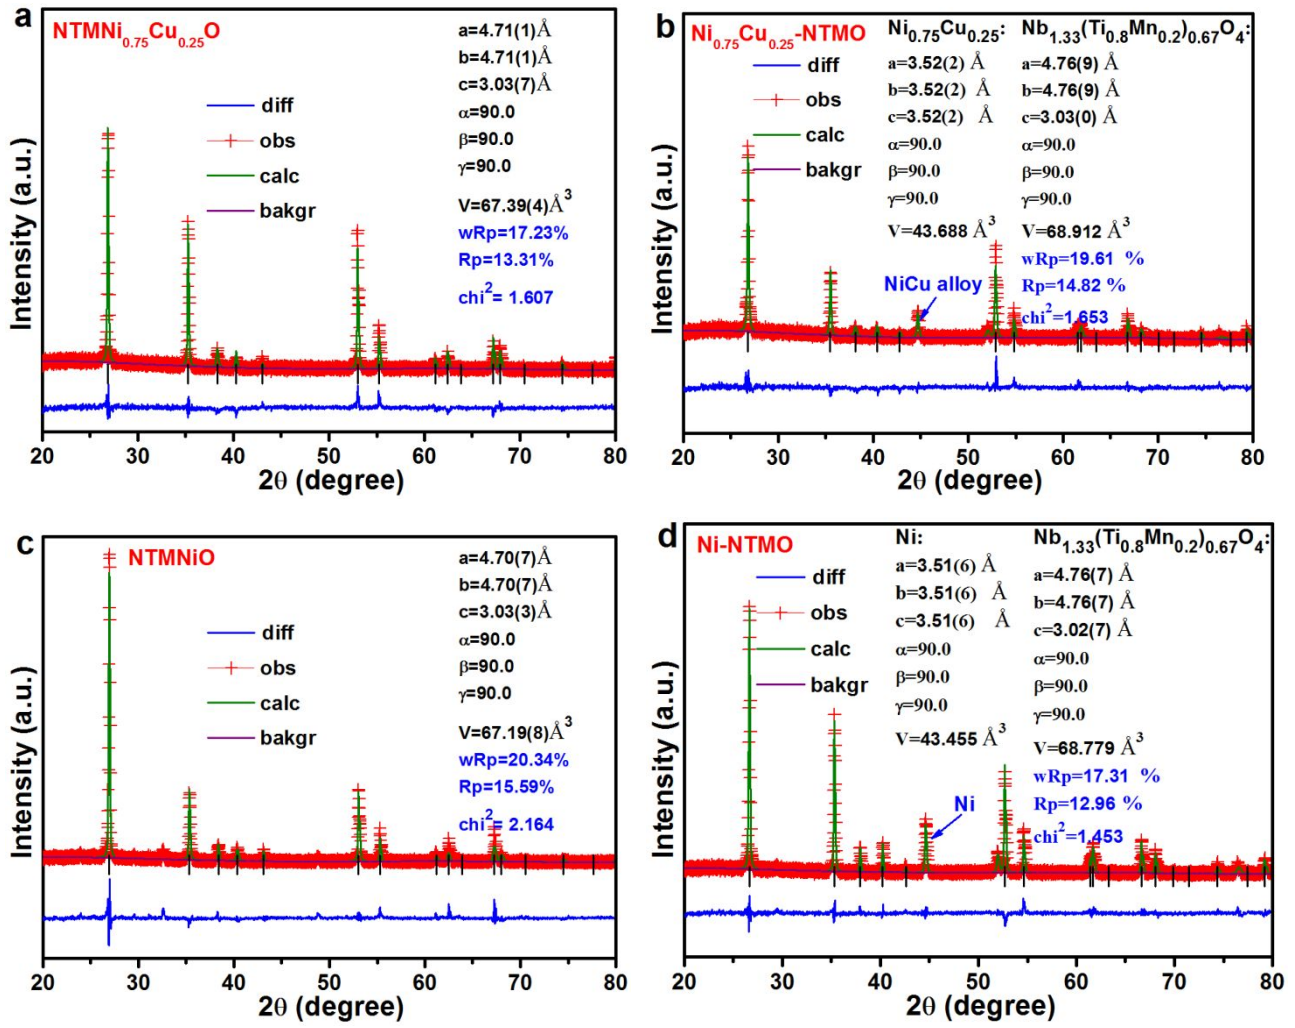

**Figure S2.** XRD rietveld refinement patterns of (a) oxidized  $\text{NTMNi}_{0.75}\text{Cu}_{0.25}\text{O}$ ; (b) reduced  $\text{Ni}_{0.75}\text{Cu}_{0.25}\text{-NTMO}$ ; (c) oxidized  $\text{NTMNiO}$ ; (d) reduced  $\text{Ni-NTMO}$ .

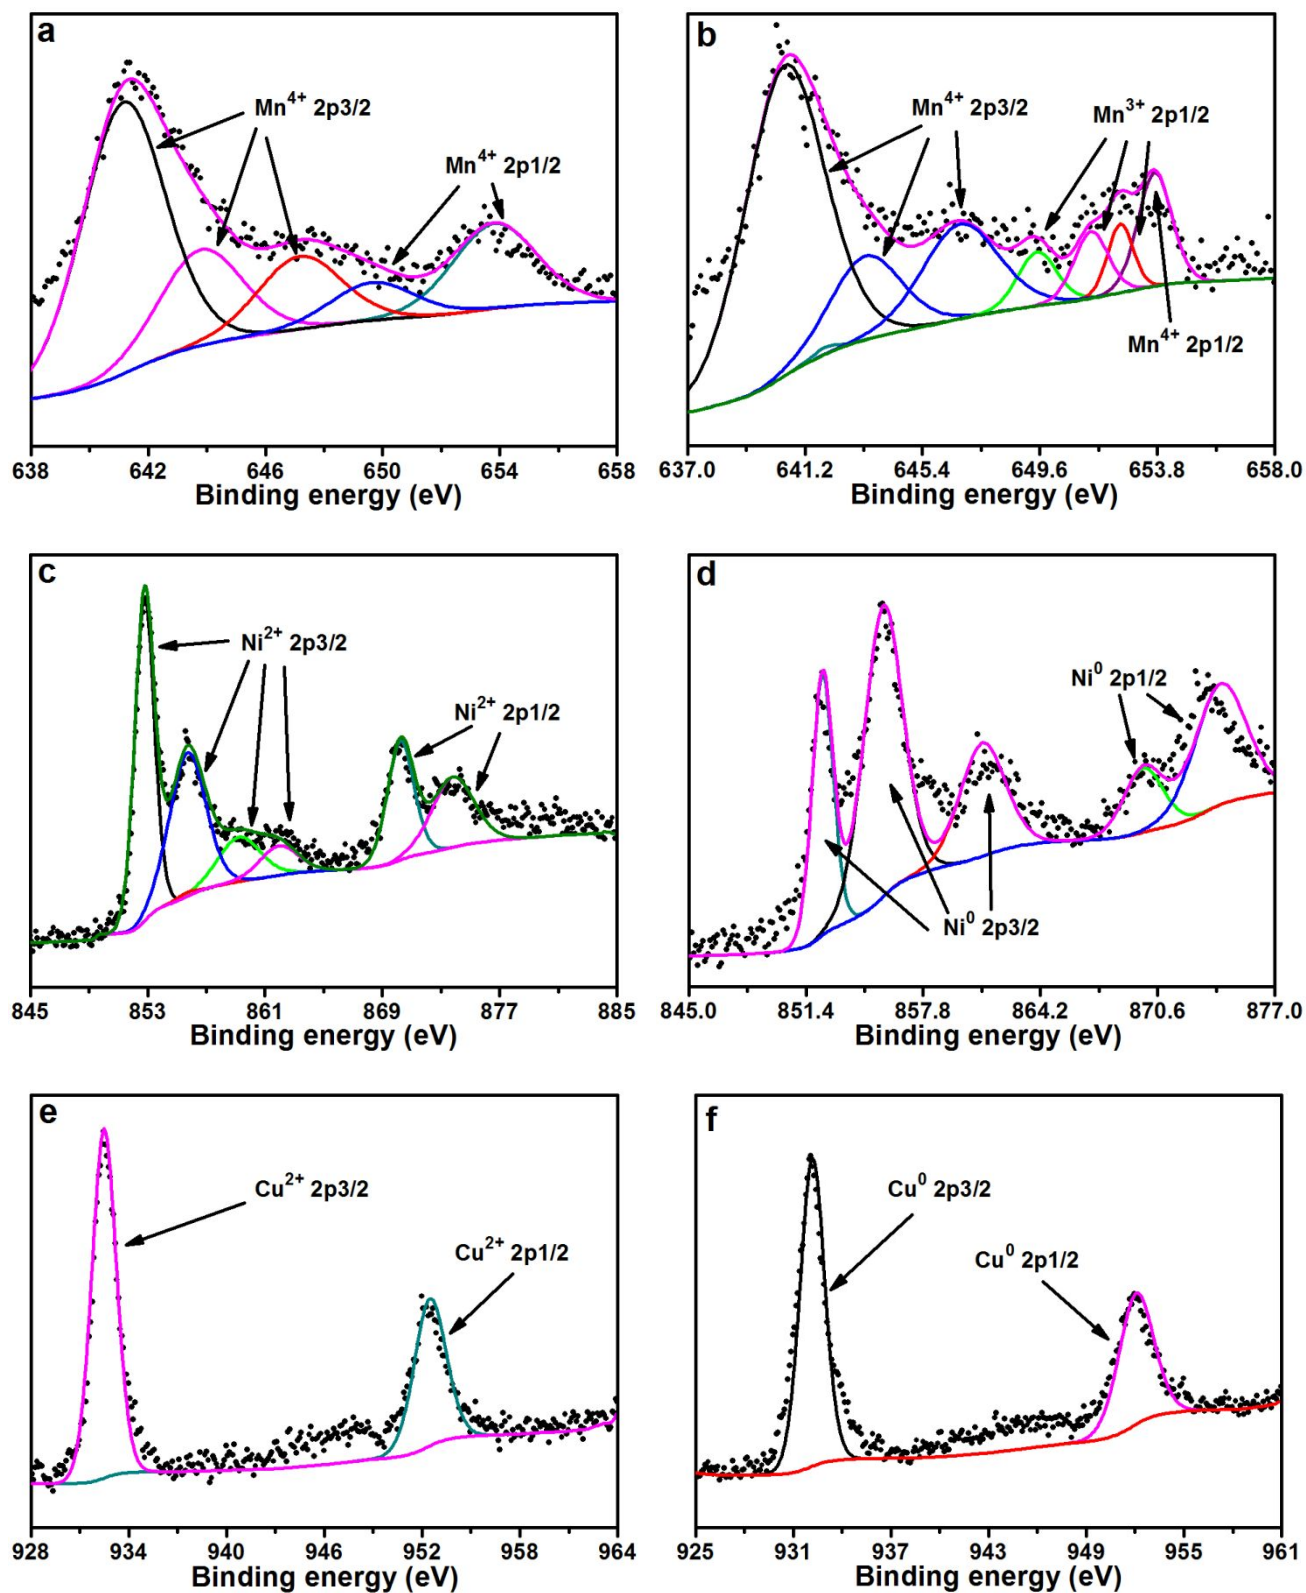

**Figure S3.** X-ray photoelectron spectroscopy of (a) Mn, (c) Ni, (e) Cu in the oxidized NTMNi<sub>0.5</sub>Cu<sub>0.5</sub>O; (b) Mn, (d) Ni, (f) Cu in the reduced Ni<sub>0.5</sub>Cu<sub>0.5</sub>-NTMO.

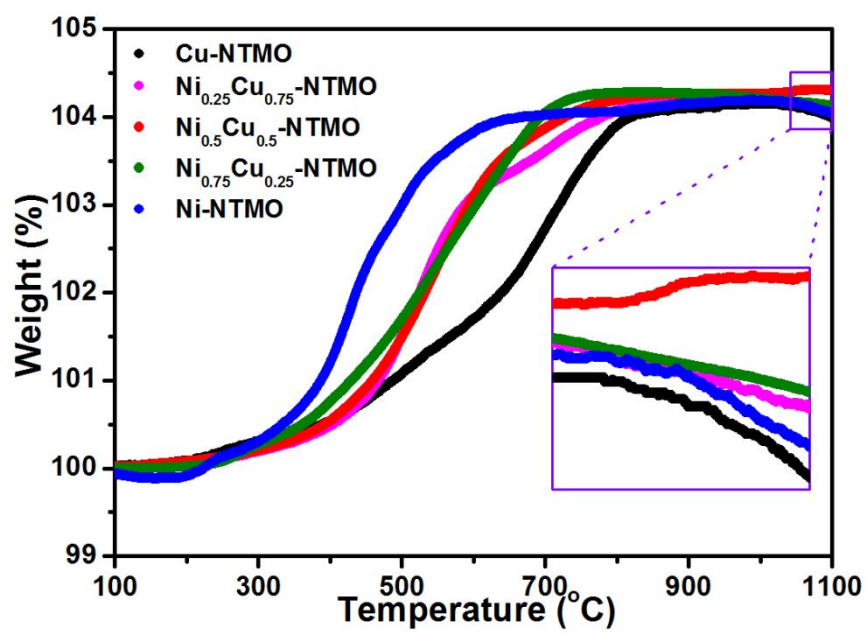

**Figure S4.** TGA tests of the reduced samples from 100 to 1100 °C in air.



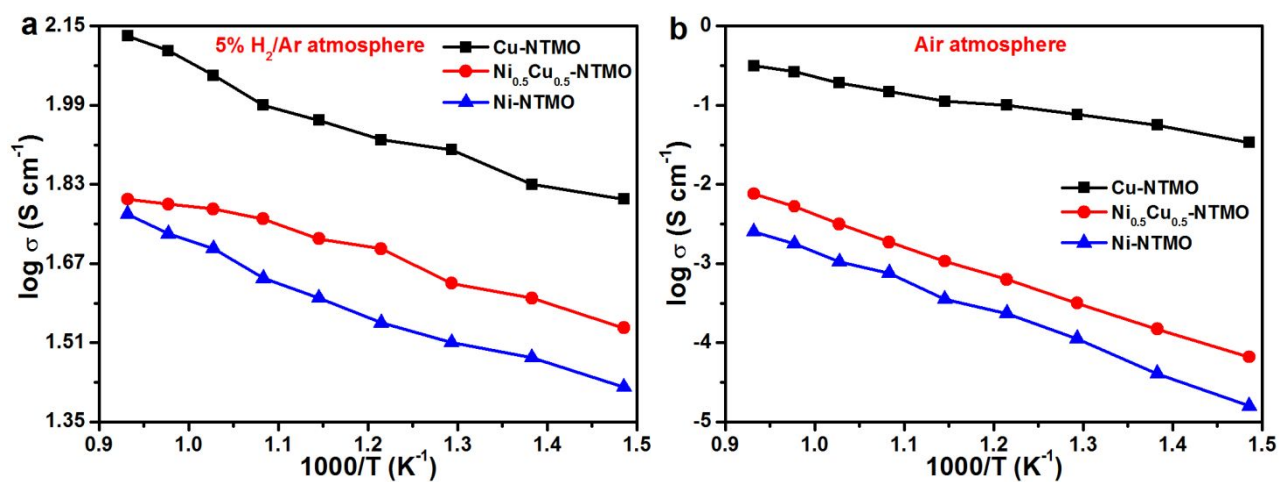

**Figure S5.** The dependence of mixed conductivity on temperature of the reduced samples in (a) 5%  $\text{H}_2/\text{Ar}$  and (b) air atmosphere.

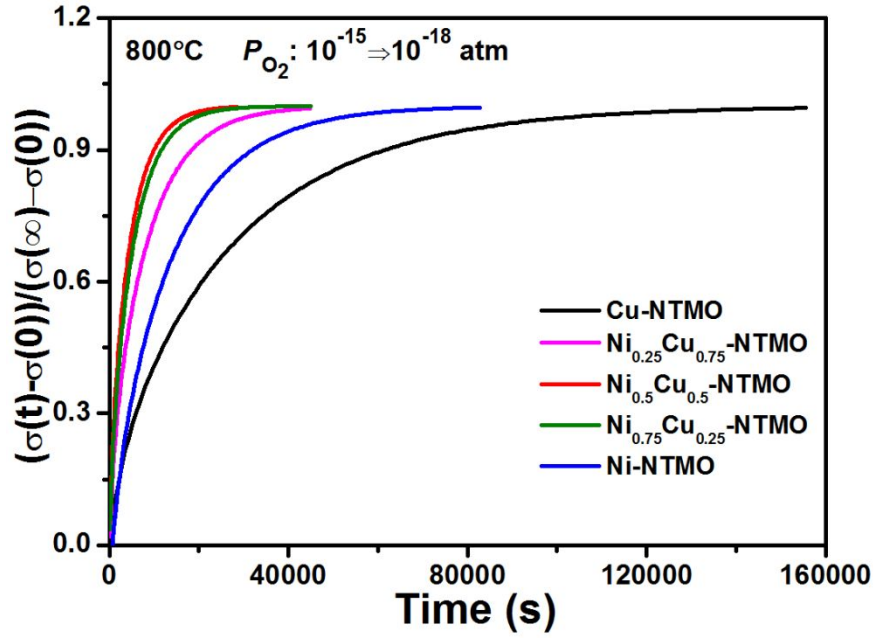

**Figure S6.** Oxygen exchange coefficient diagram of the reduced samples.

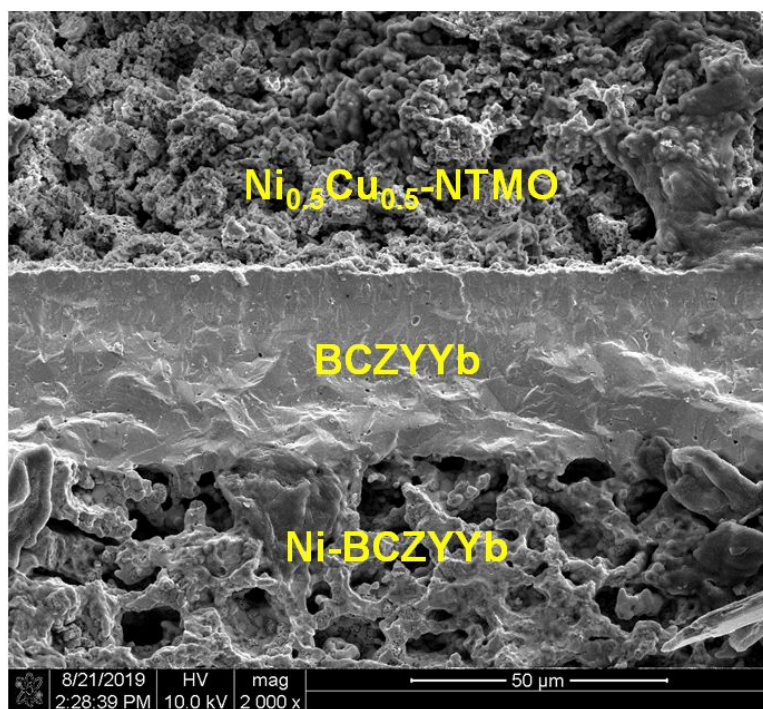

**Figure S7.** Cross sectional microstructure of a solid oxide electrolyser with a configuration of  $\text{Ni}_{0.5}\text{Cu}_{0.5}\text{-NTMO-SDC|BCZYYb|Ni-BCZYYb}$  before test.



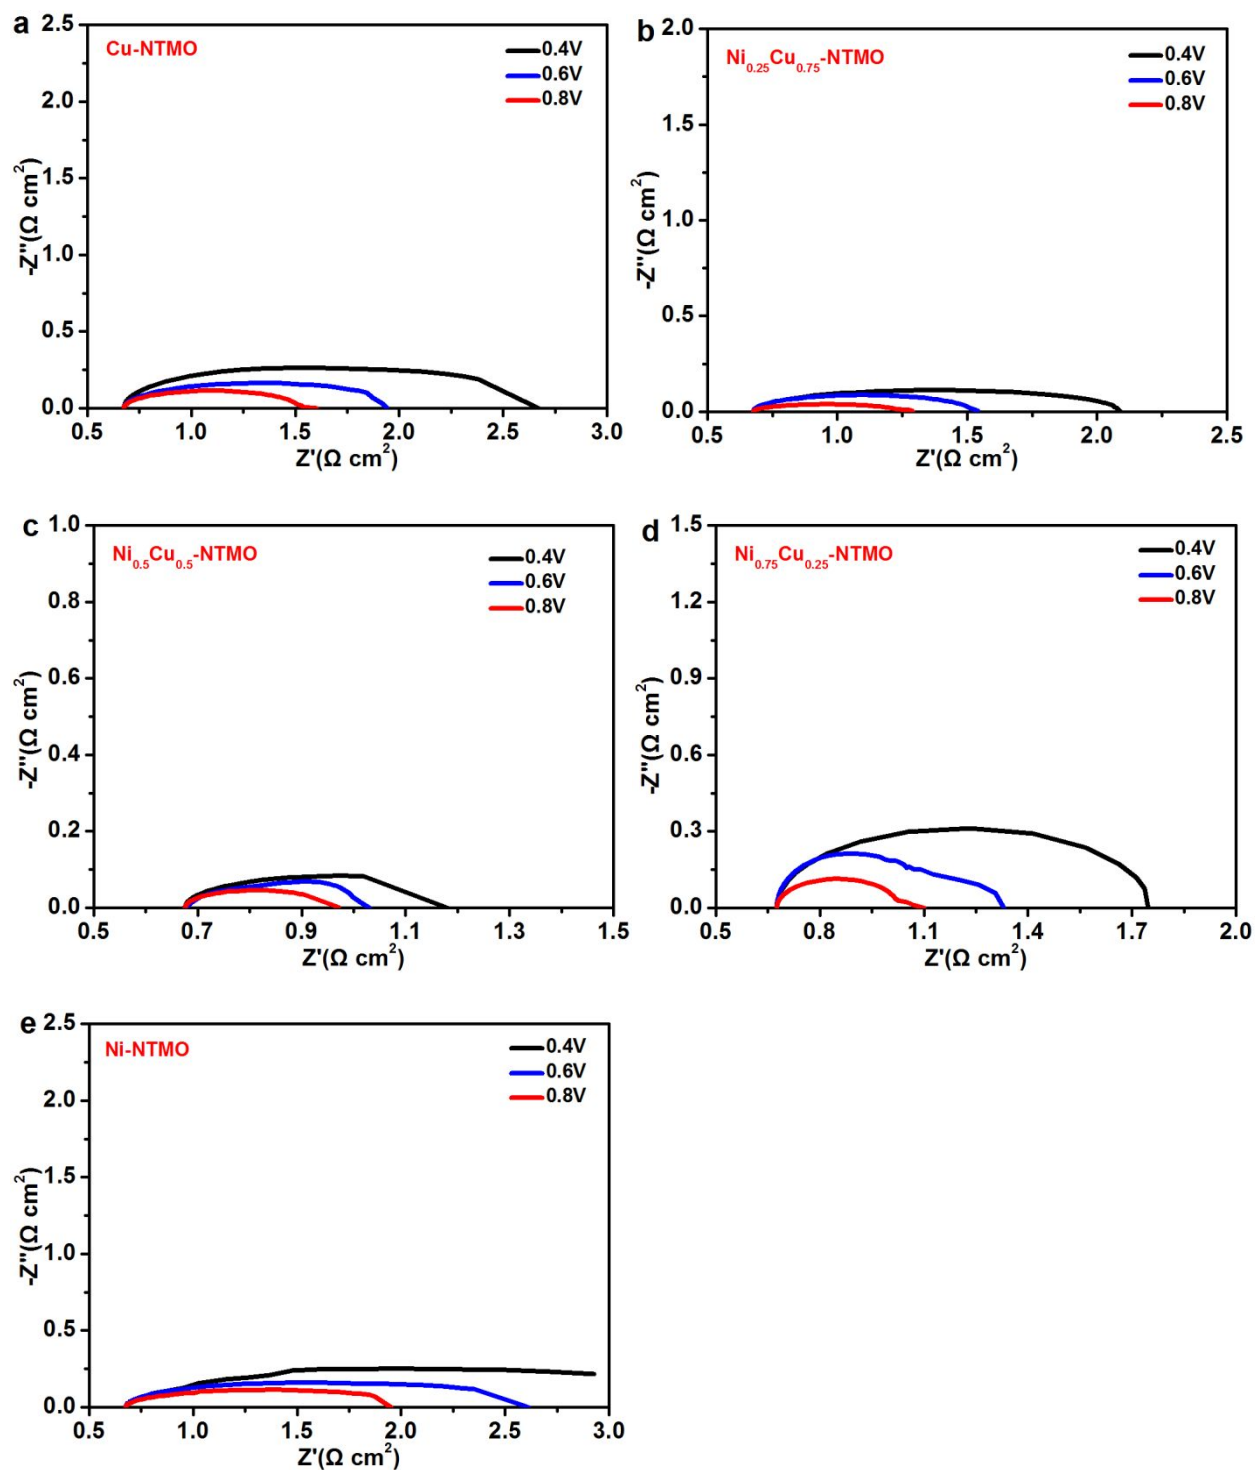

**Figure S8.** AC impedance of solid oxide electrolyser based on (a) Cu-NTMO, (b)  $\text{Ni}_{0.25}\text{Cu}_{0.75}$ -NTMO, (c)  $\text{Ni}_{0.5}\text{Cu}_{0.5}$ -NTMO, (d)  $\text{Ni}_{0.75}\text{Cu}_{0.25}$ -NTMO, (e) Ni-NTMO anodes under various potentials at 700 °C.

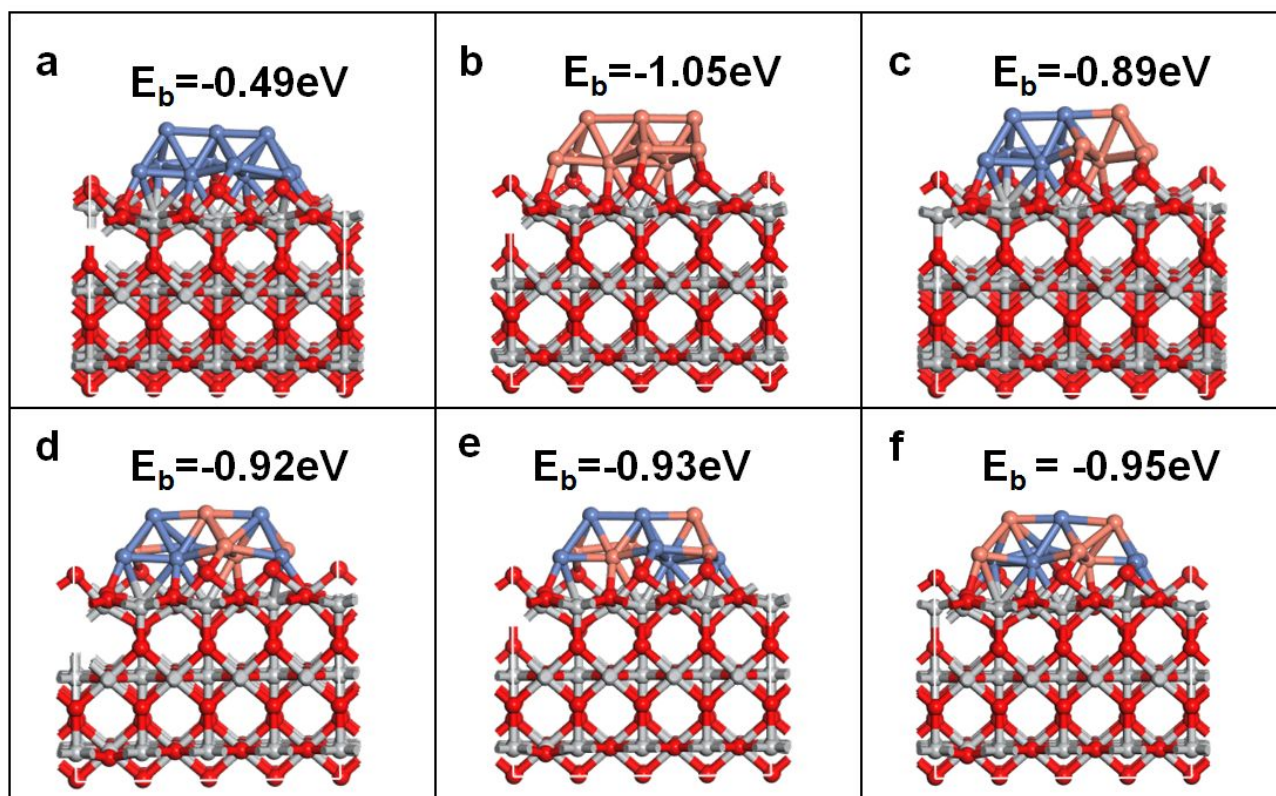

**Figure S9.** Optimization structure and binding energy of clusters. (a) Ni<sub>11</sub> cluster; (b) Cu<sub>11</sub> cluster; (c) (Ni-Cu)-1 cluster; (d) (Ni-Cu)-2 cluster; (e) (Ni-Cu)-3 cluster ; (f) (Ni-Cu)-4 cluster. (copper in orange, nickel in blue, titanium in silver white, oxygen in red)

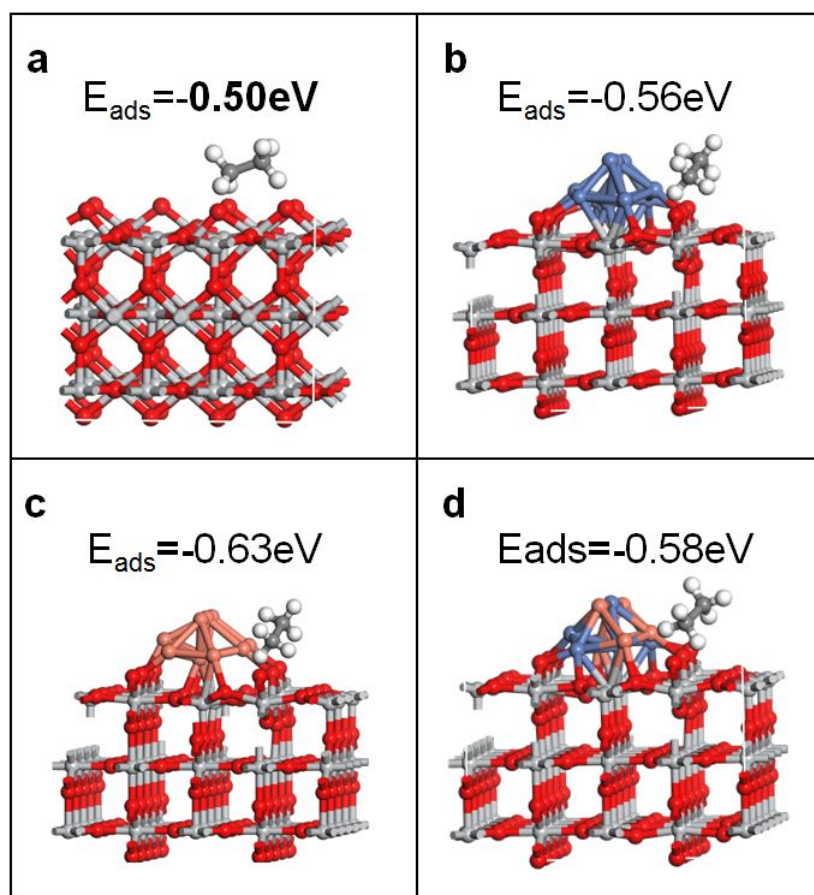

**Figure S10.** Different adsorption configurations of ethane on the  $\text{TiO}_2$  system. (a) The defect surface; (b) The  $\text{Ni/TiO}_2$  system; (c) The  $\text{Cu/TiO}_2$  system; (d) The  $\text{Ni-Cu/TiO}_2$  system. (carbon in gray, copper in orange, nickel in blue, titanium in silver white, oxygen in red and hydrogen in white)

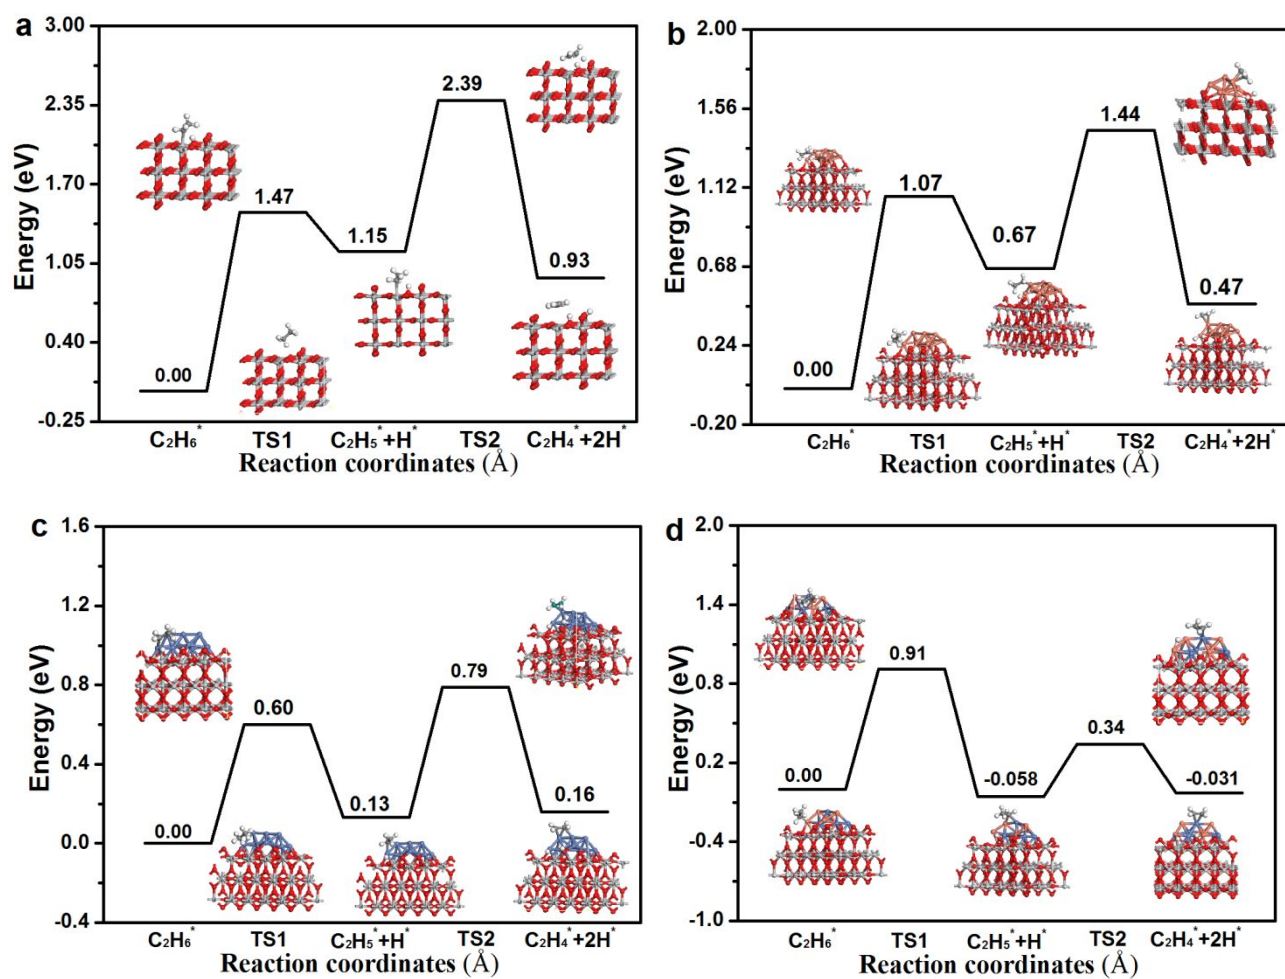

**Figure S11.** Potential energy profile for the ethane dehydrogenation on (a) TiO<sub>2</sub> defect surface, (b) Cu/TiO<sub>2</sub> interface, (c) Ni/TiO<sub>2</sub> interface and (d) NiCu/TiO<sub>2</sub> interface. (carbon in gray, copper in orange, nickel in blue, titanium in silver white, oxygen in red and hydrogen in white)

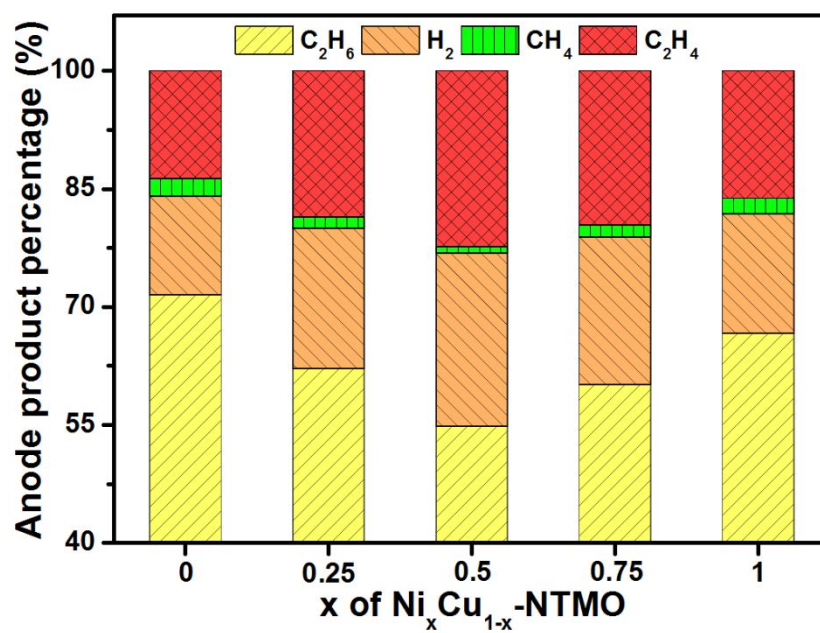

**Figure S12.** The product analysis from thermal splitting  $\text{C}_2\text{H}_6$  in the anode of solid oxide electrolyser without externally applied voltages at operation temperature of 700 °C.



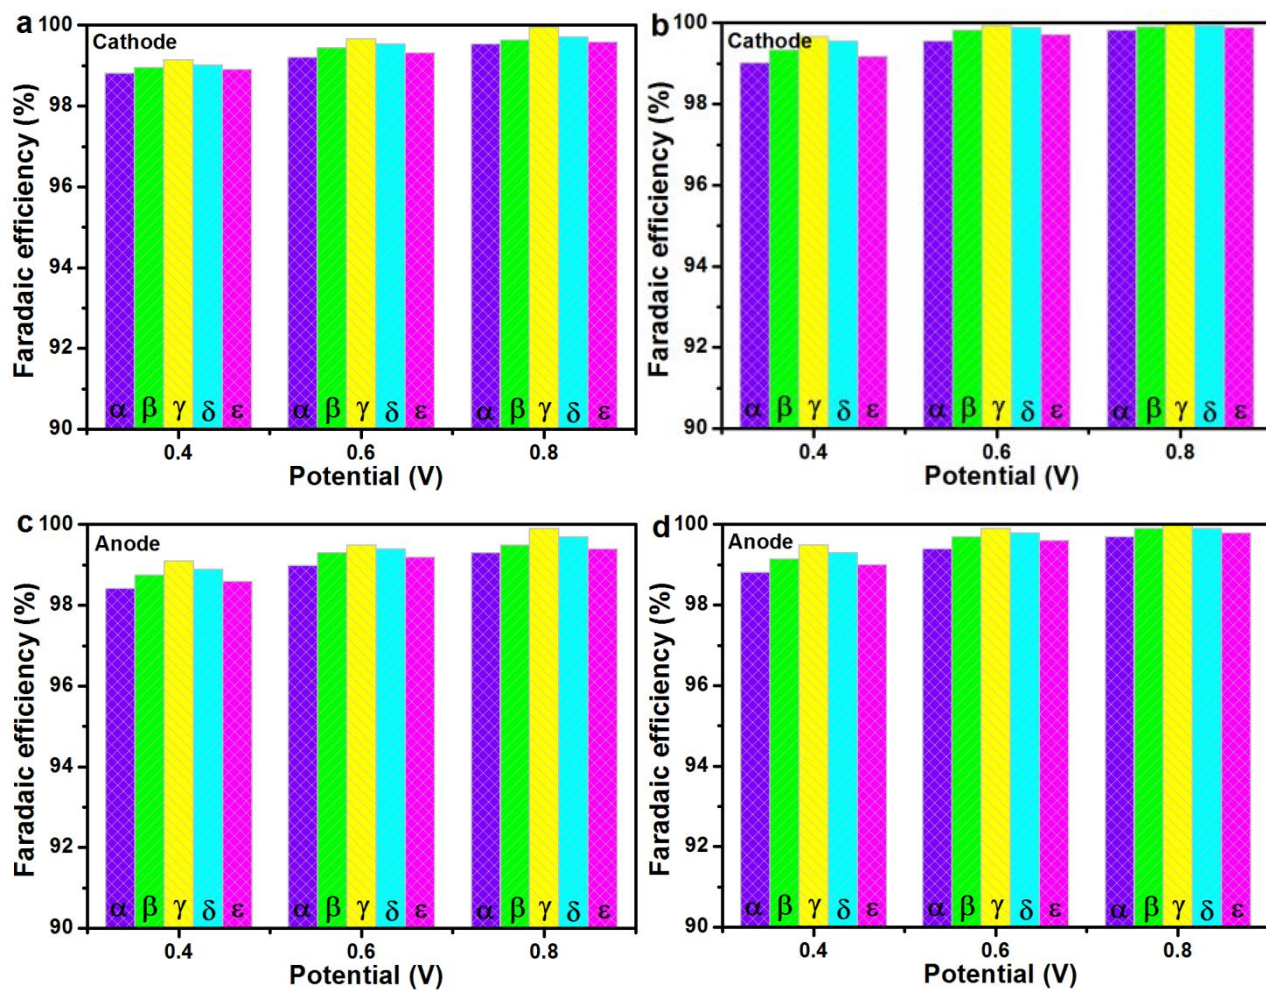

**Figure S13.** (a) The Faradaic efficiency for H<sub>2</sub> in cathode for electrochemical dehydrogenation of C<sub>2</sub>H<sub>6</sub>; (b) The Faradaic efficiency for CO/H<sub>2</sub> in cathode for electrochemical dehydrogenation of C<sub>2</sub>H<sub>6</sub> in conjunction with CO<sub>2</sub> reduction in cathode; (c) The Faradaic efficiency for C<sub>2</sub>H<sub>4</sub> production in anode for electrochemical dehydrogenation of C<sub>2</sub>H<sub>6</sub>; (d) The Faradaic efficiency for C<sub>2</sub>H<sub>4</sub> production in anode for electrochemical dehydrogenation of C<sub>2</sub>H<sub>6</sub> with CO<sub>2</sub> reduction. (α: Cu-NTMO, β: Ni<sub>0.25</sub>Cu<sub>0.75</sub>-NTMO, γ: Ni<sub>0.5</sub>Cu<sub>0.5</sub>-NTMO, δ: Ni<sub>0.75</sub>Cu<sub>0.25</sub>-NTMO, ε: Ni-NTMO).



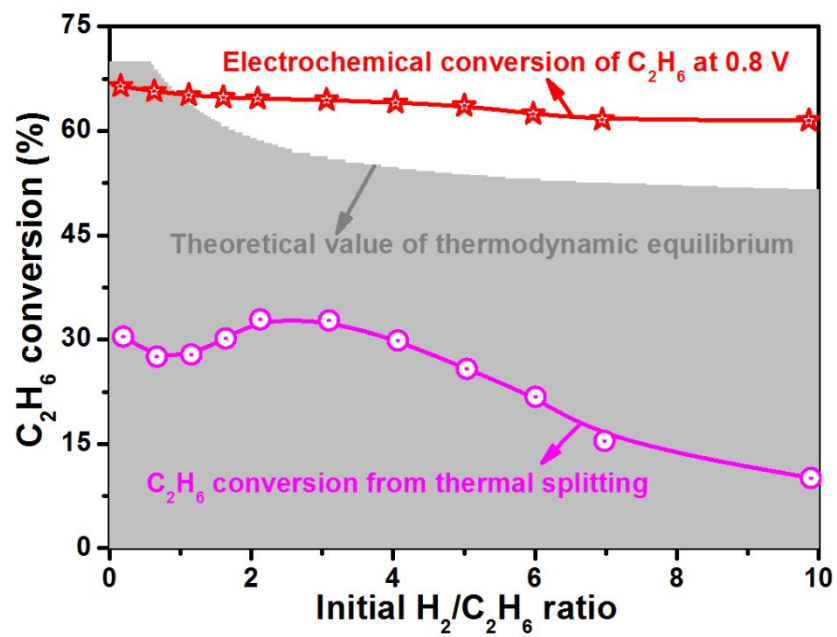

**Figure S14** .The  $C_2H_6$  conversion at different modes with  $Ni_{0.5}Cu_{0.5}$ -NTMO anode in solid oxide electrolyser.

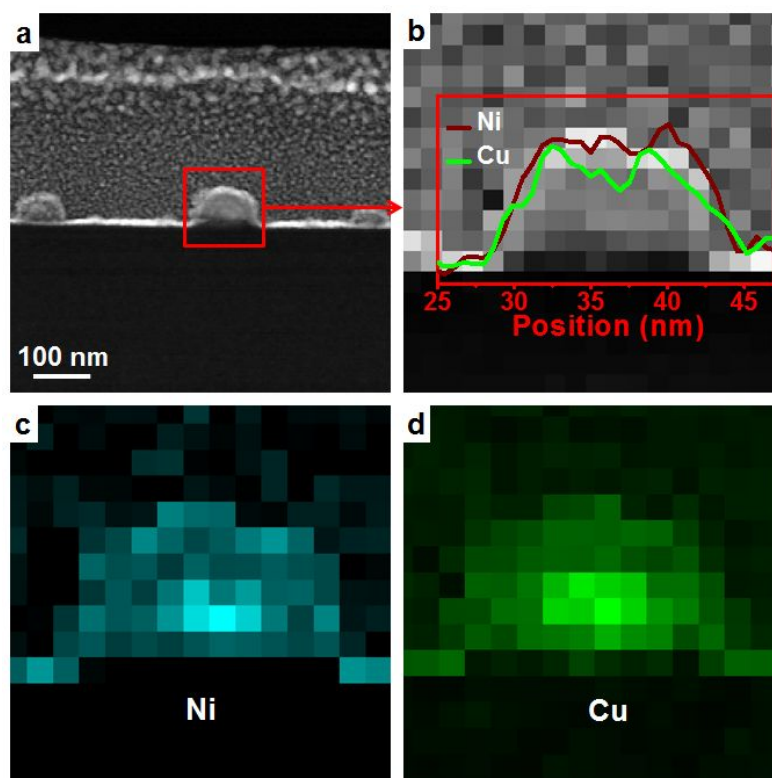

**Figure S15.** (a) The EDX mapping in HAADF-STEM mode of  $\text{Ni}_{0.5}\text{Cu}_{0.5}$ -NTMO anode after stability test for electrochemical dehydrogenation of  $\text{C}_2\text{H}_6$ ; (b) EDX elemental line analysis across typical  $\text{Ni}_{0.5}\text{Cu}_{0.5}$  particle; (c, d) Cu and Ni mapping of the exsolved nanoparticle.

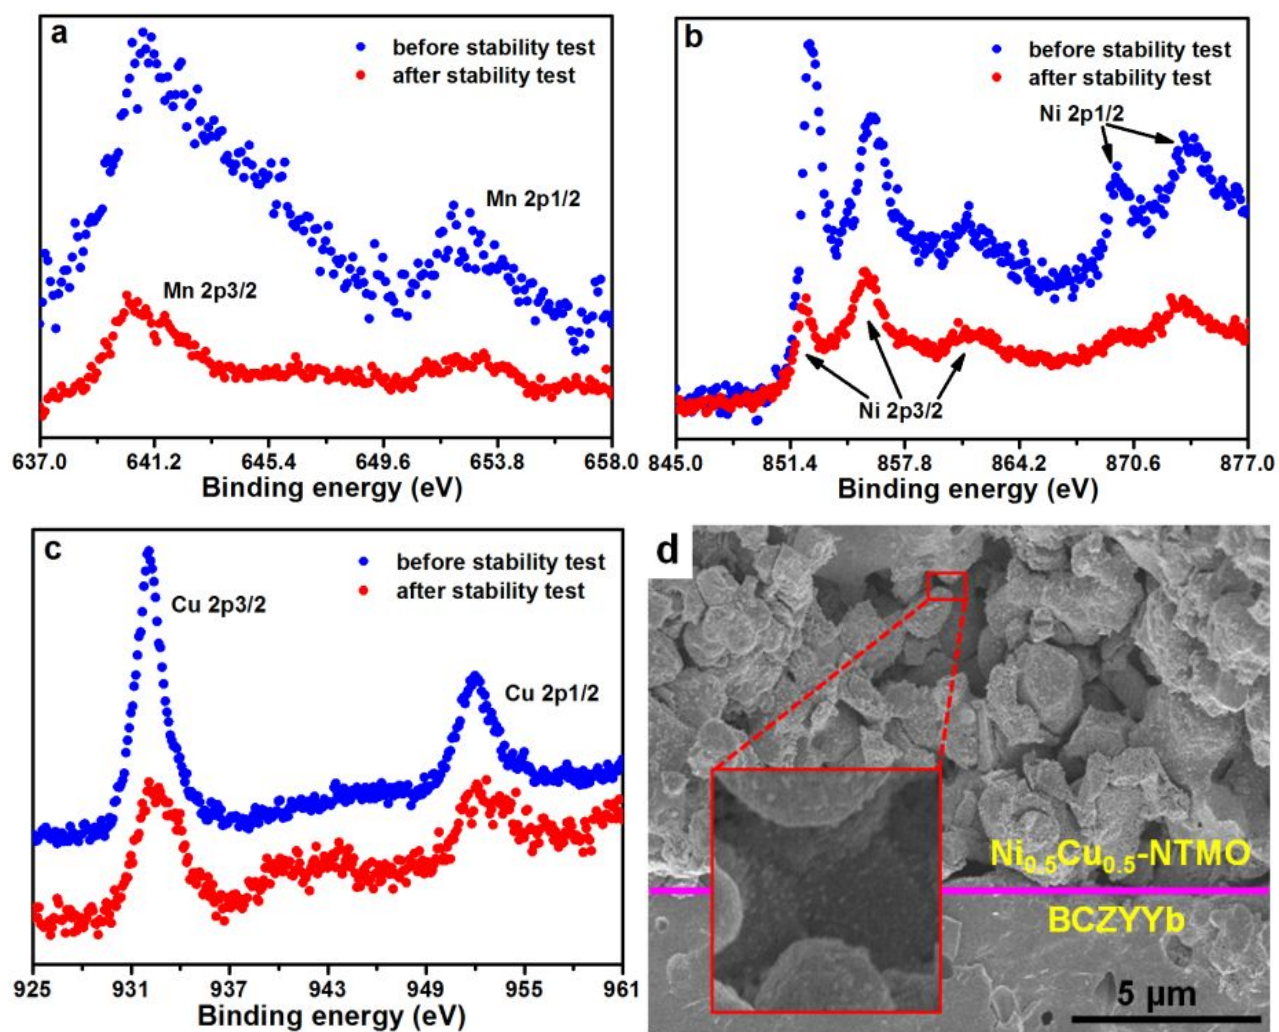

**Figure S16.** X-ray photoelectron spectroscopy of (a) Mn, (b) Ni, (c) Cu in Ni<sub>0.5</sub>Cu<sub>0.5</sub>-NTMO anode before and after stability test for electrochemical dehydrogenation of C<sub>2</sub>H<sub>6</sub>; (d) SEM images of the Ni<sub>0.5</sub>Cu<sub>0.5</sub>-NTMO porous electrodes after stability test for C<sub>2</sub>H<sub>6</sub> conversion.

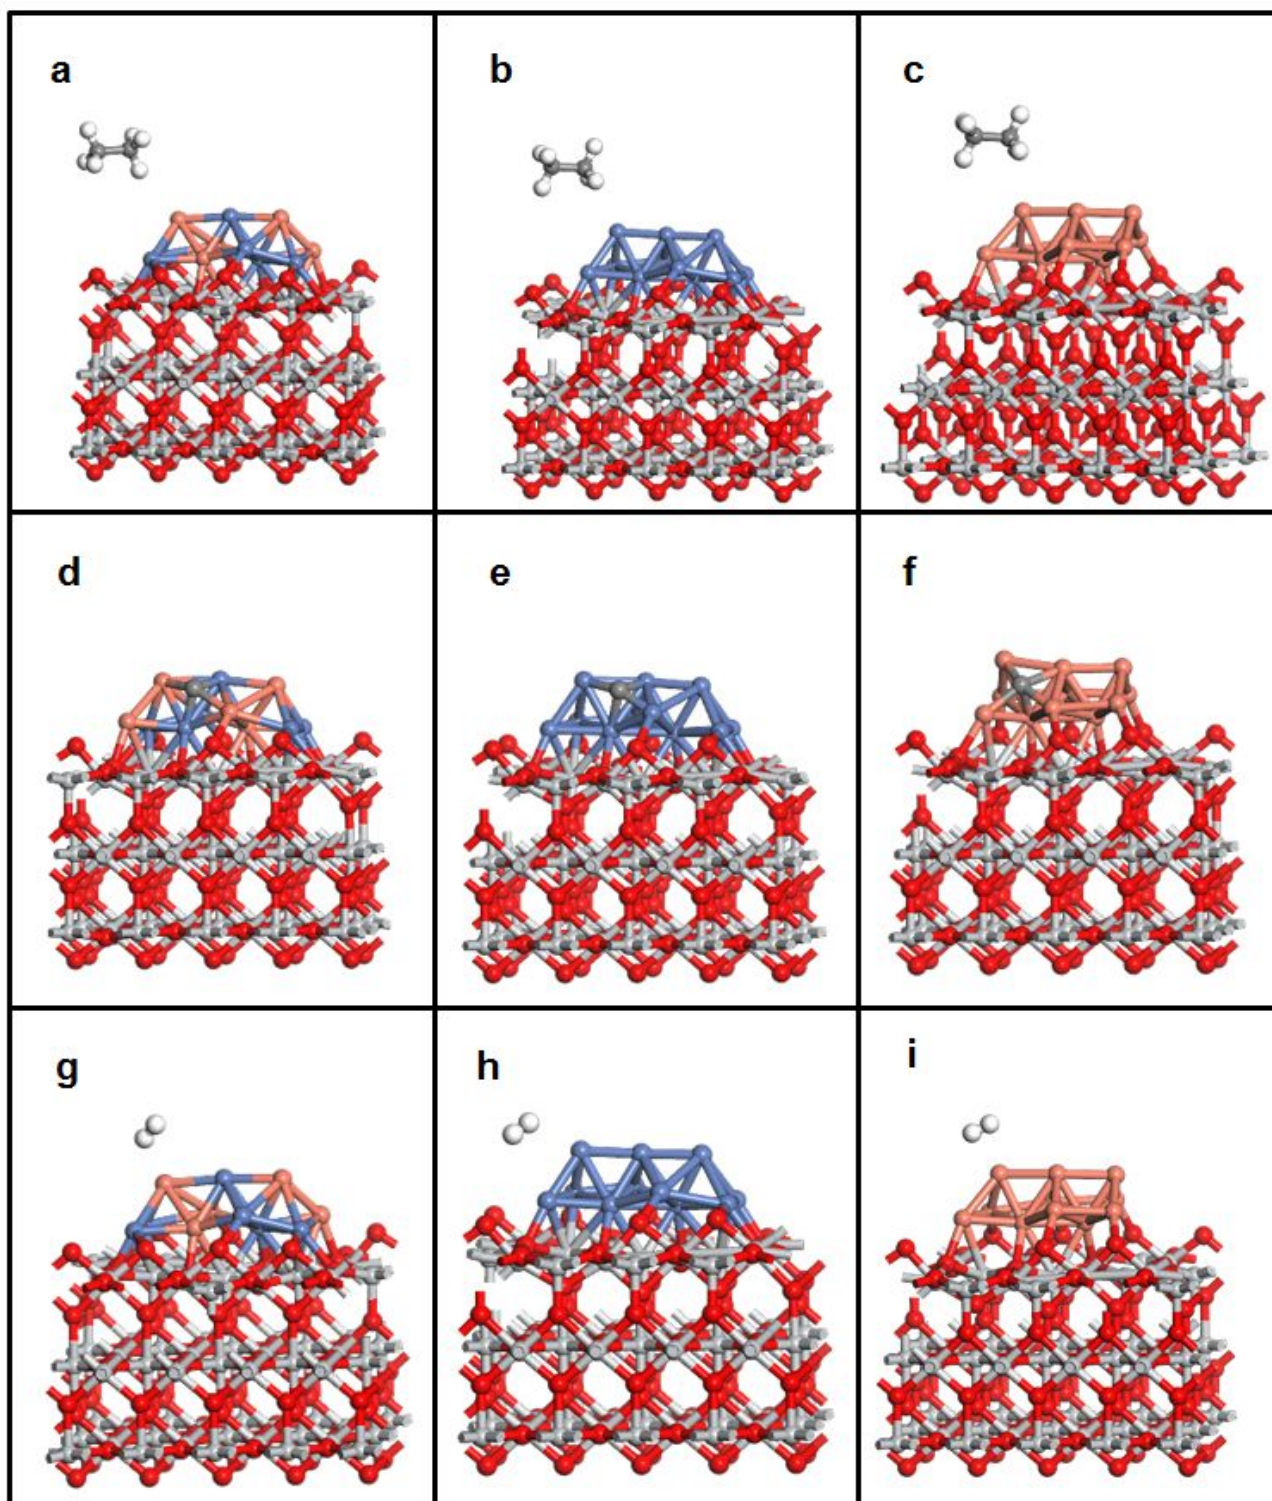

**Figure S17.** Optimized structure of ethane deep cracking process: (a-c)  $\text{C}_2\text{H}_6$  (g) on cluster/ $\text{TiO}_2$  system; (d-f)  $\text{C}$  adsorbed on cluster/ $\text{TiO}_2$  system; (g-i)  $\text{H}_2$  (g) on cluster/ $\text{TiO}_2$  system. (a), (d) and (g): on (Ni-Cu)/ $\text{TiO}_2$  system; (b), (e) and (h): on Ni/ $\text{TiO}_2$  system; (c), (f) and (i): on Cu/ $\text{TiO}_2$  system. (carbon in gray, copper in orange, nickel in blue, titanium in silver white, oxygen in red and hydrogen in white)

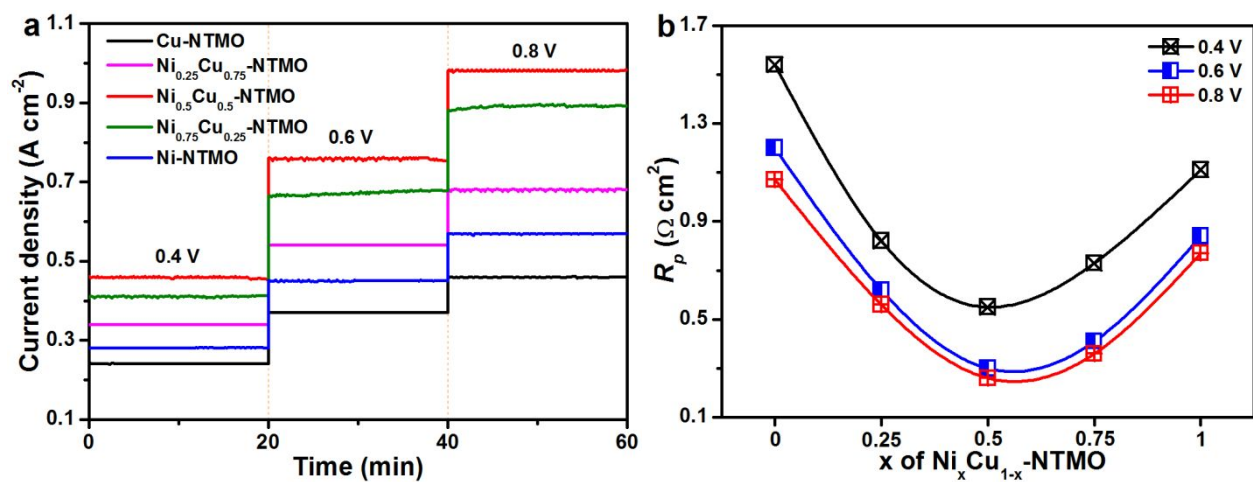

**Figure S18.** (a) The short-term operation of  $\text{C}_2\text{H}_6$  dehydrogenation with the composite anodes in combination with  $\text{CO}_2$  reduction at different voltages; (b) The electrode polarizations with different anodes at 0.4-0.8 V at  $700^\circ\text{C}$ .



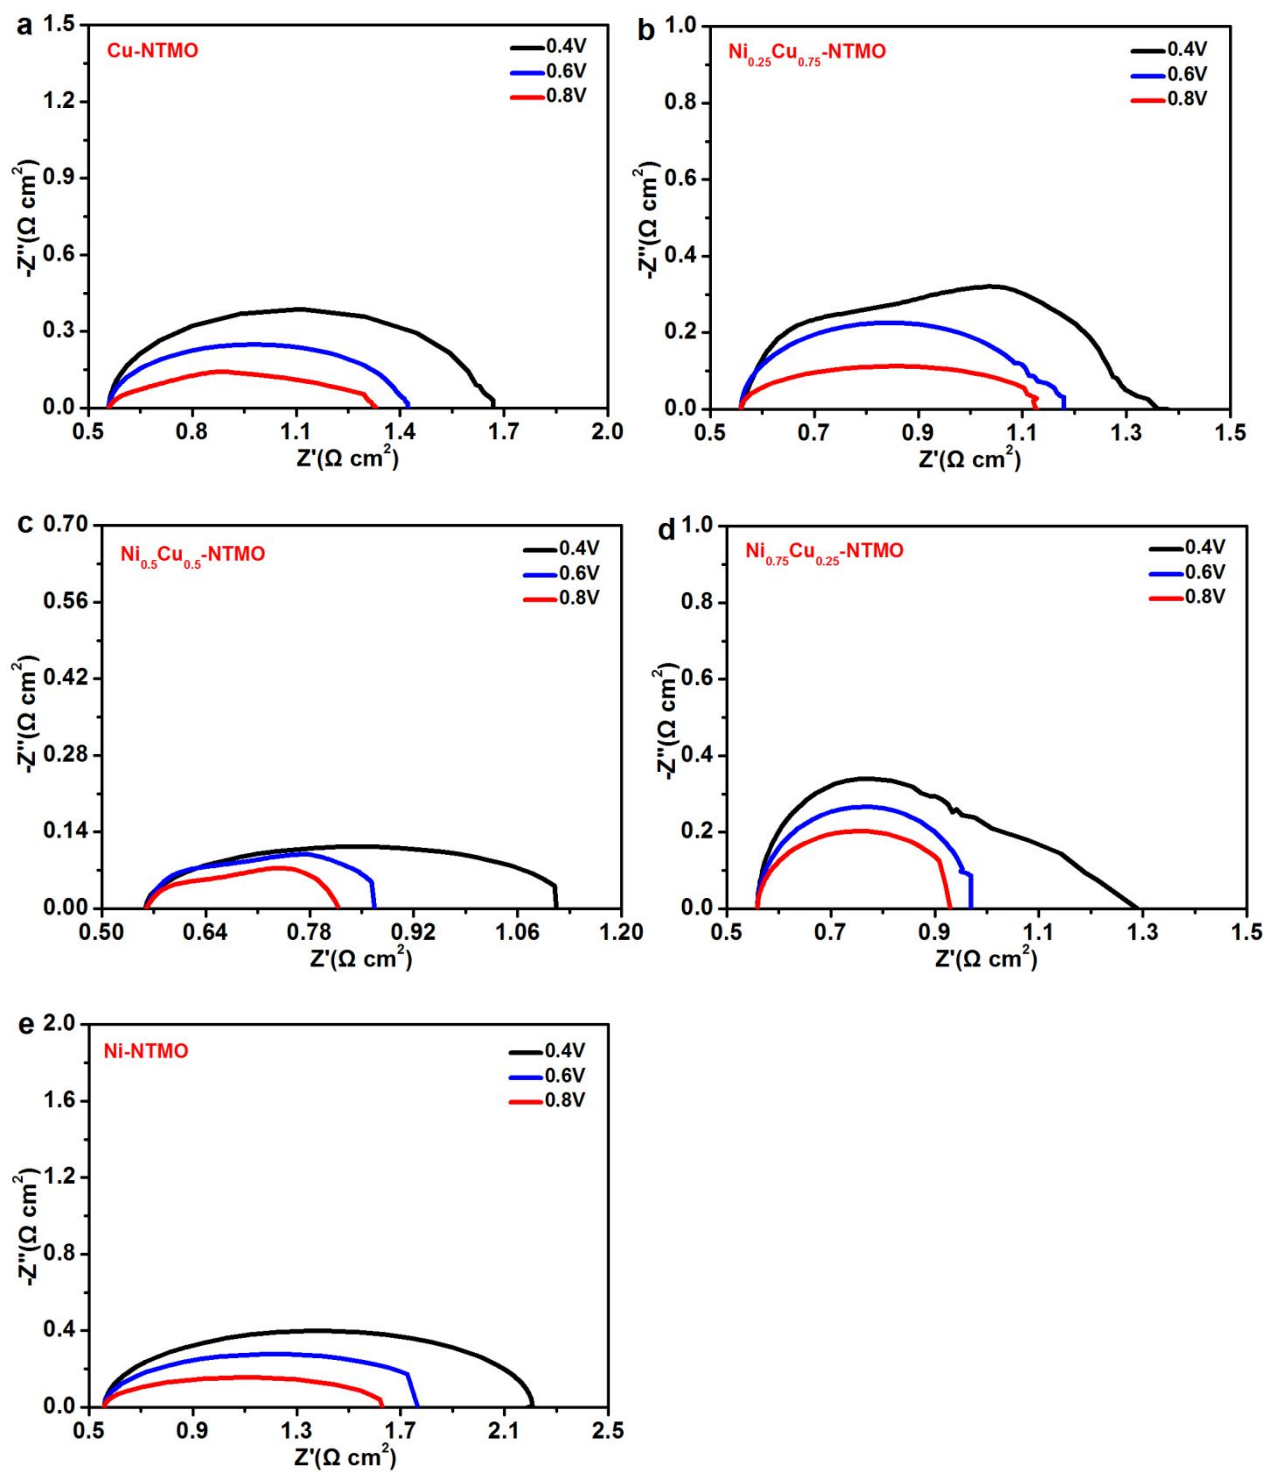

**Figure S19.** AC impedance of solid oxide electrolyser based on (a) Cu-NTMO, (b) Ni<sub>0.25</sub>Cu<sub>0.75</sub>-NTMO, (c) Ni<sub>0.5</sub>Cu<sub>0.5</sub>-NTMO, (d) Ni<sub>0.75</sub>Cu<sub>0.25</sub>-NTMO, (e) Ni-NTMO anodes under various potentials at 700 °C.



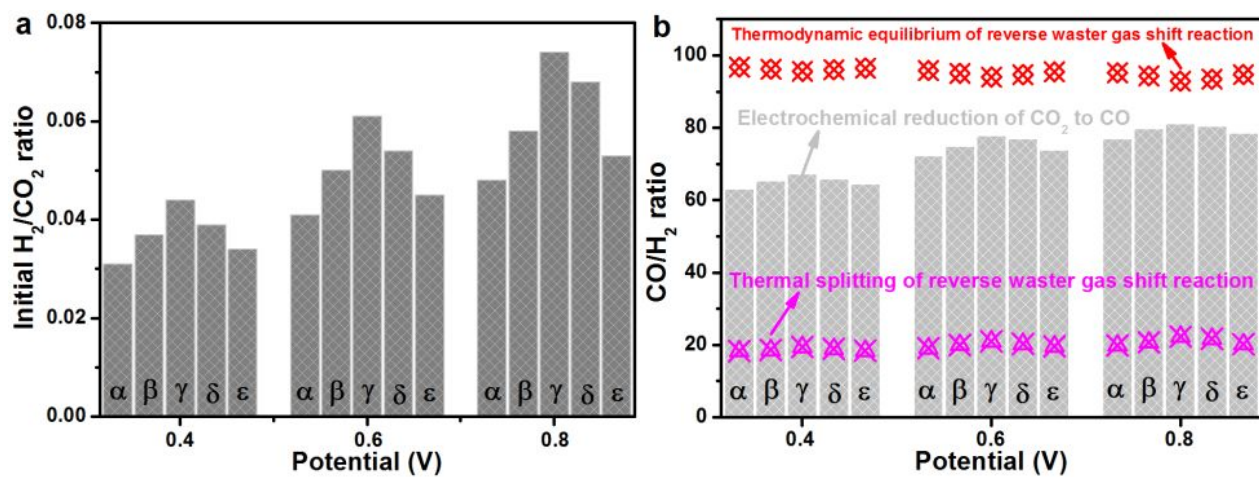

**Figure S20.** (a) Directly pumping the gas mixture of  $H_2/CO_2$  to cathode under open circuit conditions, where the  $H_2$  is identical to the  $H_2$  generation amount in cathode during electrochemical  $C_2H_6$  dehydrogenation; (b) the ratio of  $CO/H_2$  at different modes in the cathode.

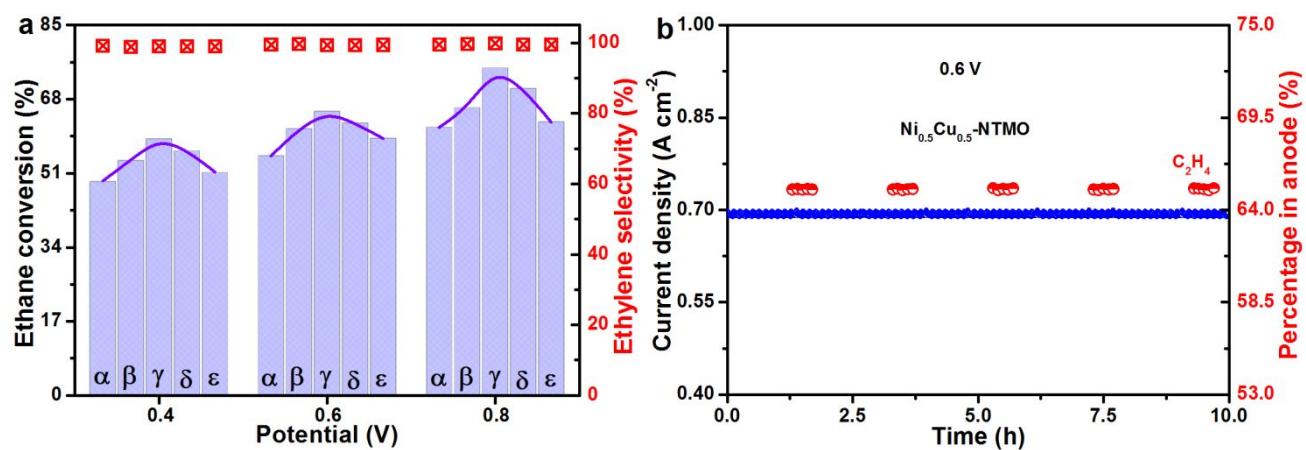

**Figure S21.** (a)  $C_2H_6$  conversion and  $C_2H_4$  selectivity in anode in combination with  $CO_2$  reduction in cathode; (b) The short term performance of the electrochemical dehydrogenation of  $C_2H_6$  with the  $Ni_{0.5}Cu_{0.5}$ -NTMO anode in a proton-conducting solid oxide electrolyser. ( $\alpha$ : Cu-NTMO,  $\beta$ :  $Ni_{0.25}Cu_{0.75}$ -NTMO,  $\gamma$ :  $Ni_{0.5}Cu_{0.5}$ -NTMO,  $\delta$ :  $Ni_{0.75}Cu_{0.25}$ -NTMO,  $\epsilon$ : Ni-NTMO)
